# Supplementary material for: A simple route to synthesize esterified lignin derivatives
Source: Royal Society of Chemistry journal article supplement (doi:10.1039/c9gc00844f), 2019-01-01
Supplement: c9gc00844f1.pdf [file c9gc00844f1.pdf]

# A simple route to synthesize esterified lignin derivatives

Li-Yang Liu<sup>a</sup>, Qi Hua <sup>a</sup>, and Scott Renneckar\*<sup>a</sup>

<sup>a</sup>Department of Wood Science, Faculty of Forestry, The University of British Columbia, Vancouver, BC,  
Canada

Email: scott.renneckar@ubc.ca

## Table of contents

|                 |         |
|-----------------|---------|
| Figure S1-----  | Page 2  |
| Figure S2-----  | Page 3  |
| Figure S3-----  | Page 4  |
| Figure S4-----  | Page 5  |
| Figure S5-----  | Page 6  |
| Figure S6-----  | Page 7  |
| Figure S7-----  | Page 8  |
| Figure S8-----  | Page 9  |
| Figure S9-----  | Page 10 |
| Figure S10----- | Page 11 |
| Table S1-----   | Page 12 |
| Table S2 -----  | Page 13 |
| Table S2 -----  | Page 14 |

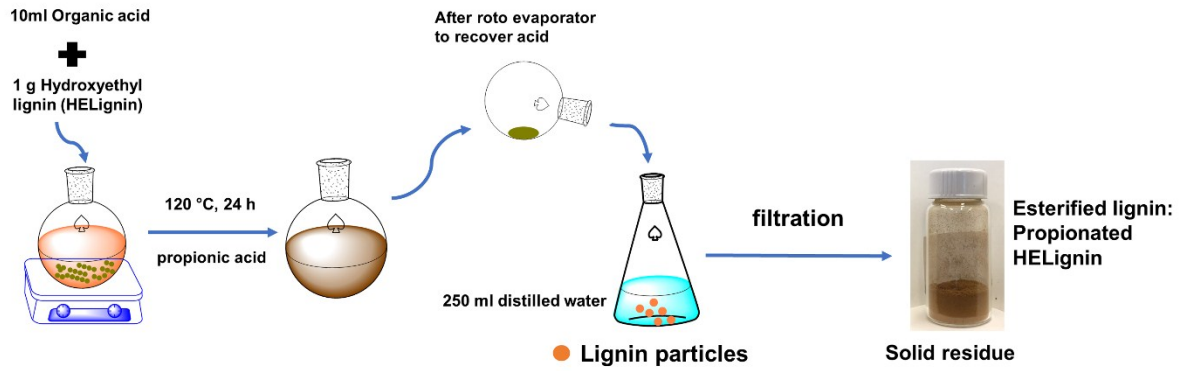

**Figure S1** the operating process of direct esterification using propionic acid to obtain propionated HELignin

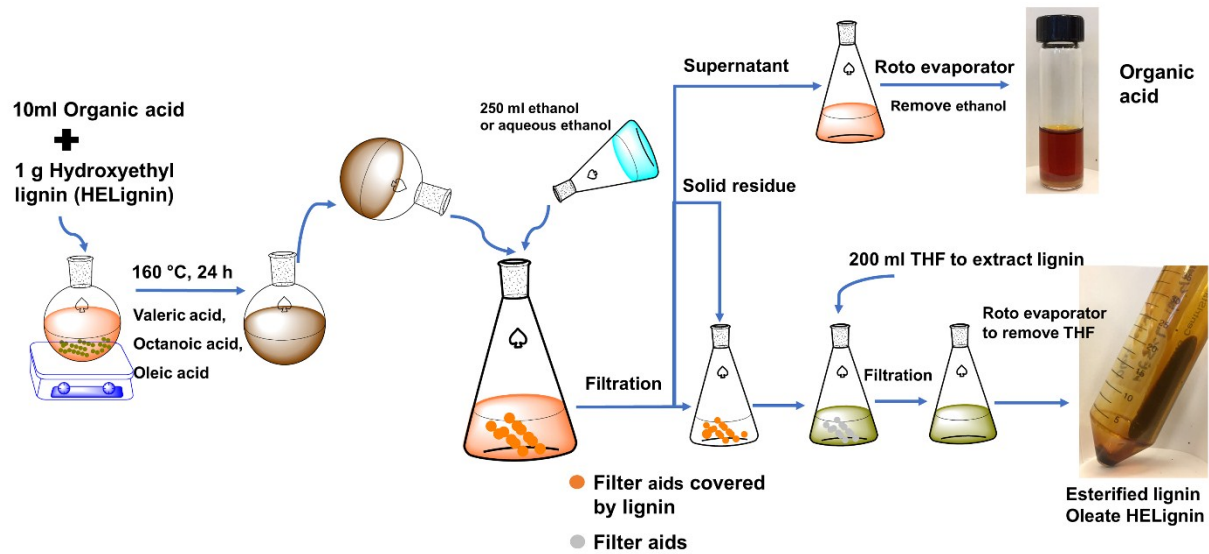

**Figure S2** the operating process of direct esterification using valeric acid, octanoic acid, and oleic acid to obtain esterified HELignin

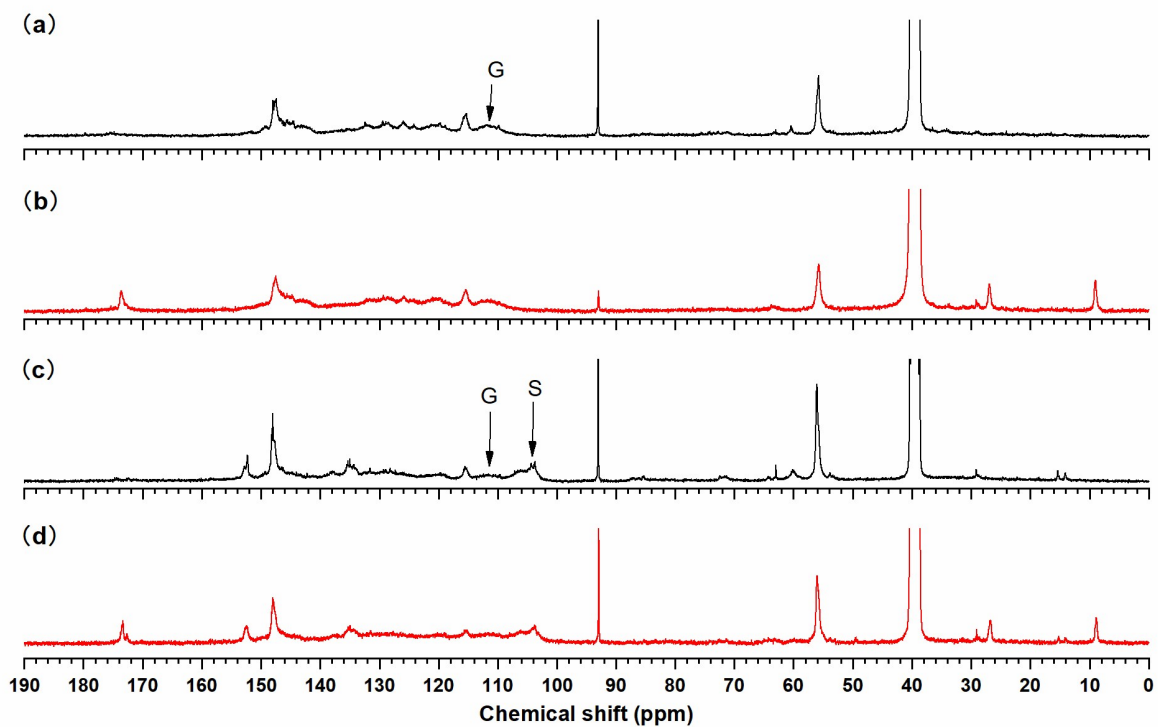

**Figure S3**  $^{13}\text{C}$  NMR spectrum of SKL (a), propionated SKL (120°C, 24 h, b), OSHL (c), and propionated OSHL (120 °C, 24h, d)

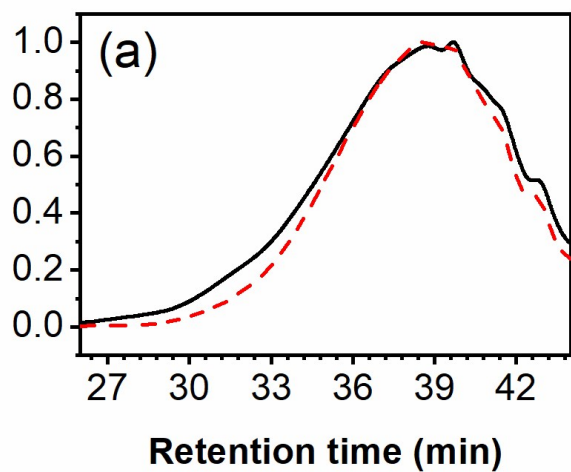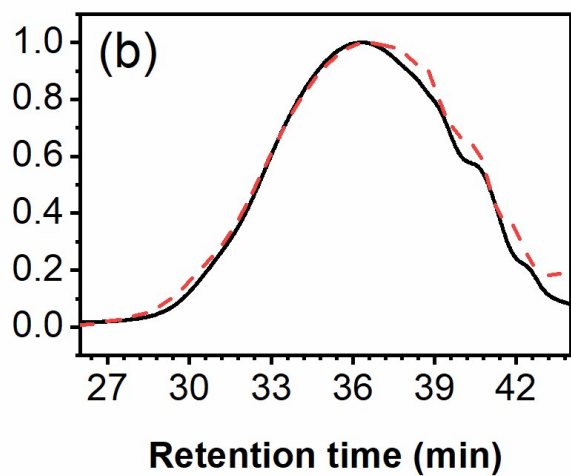

**Figure S4** The molecular weight traces of SKL (a) and OSHL before (dark line) and after (red dash) esterification using propionic acid at 120 °C for 24 h

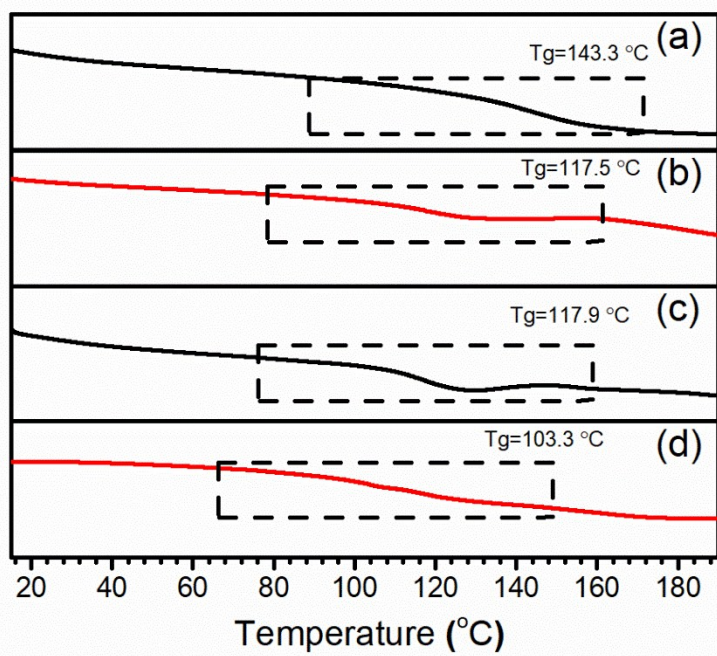

**Figure S5** DSC traces and glass transition temperature ( $T_g$ ) of SKL (a), propionate SKL (b), OSHL (c), and propionate OSHL (d)

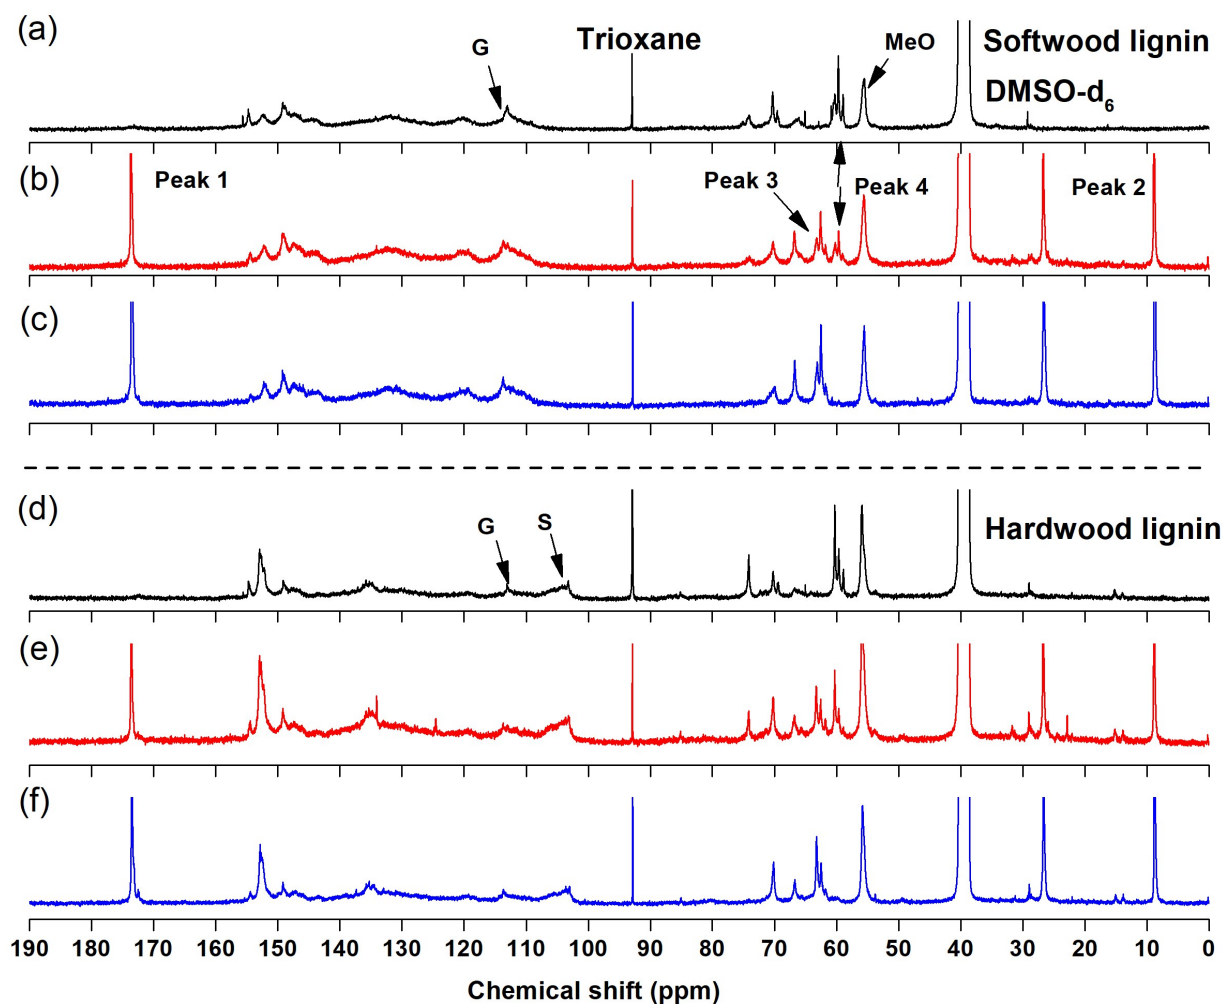

**Figure S6**  $^{13}\text{C}$  NMR spectrum of HESKL (untreated, a), propionate HESKL (90°C, 24 h, b), propionate HESKL (120 °C, 48 h, c) and HEOSHL (untreated, d), propionate HEOSHL (90°C, 24h, e), and propionate HEOSHL (120 °C, 48 h)

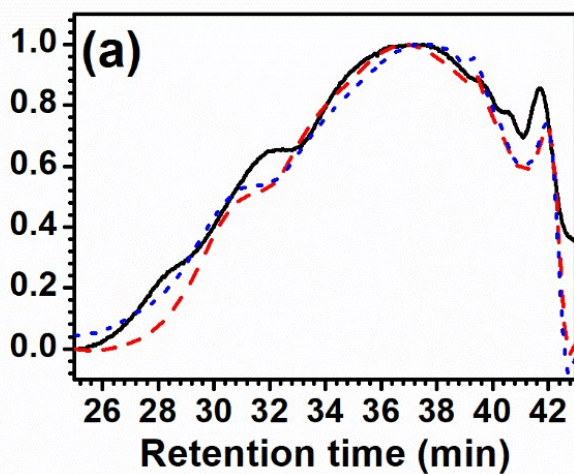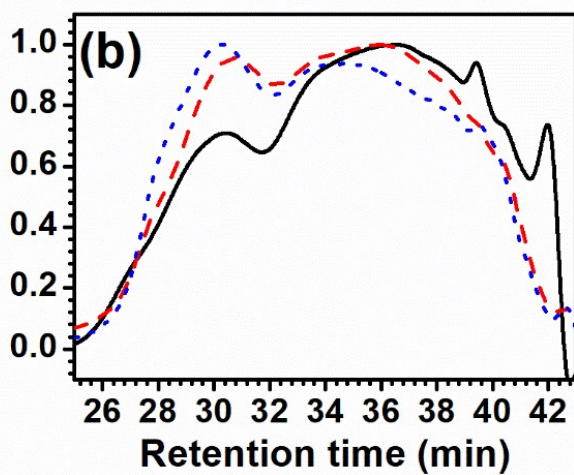

**Figure S7** Molecular weight traces of HESKL (a) and HEOSHL (b); (untreated, black line), propionate HELignin (90°C, 24 h, red short dash line), propionate HELignin (120 °C, 48 h, blue dot line)



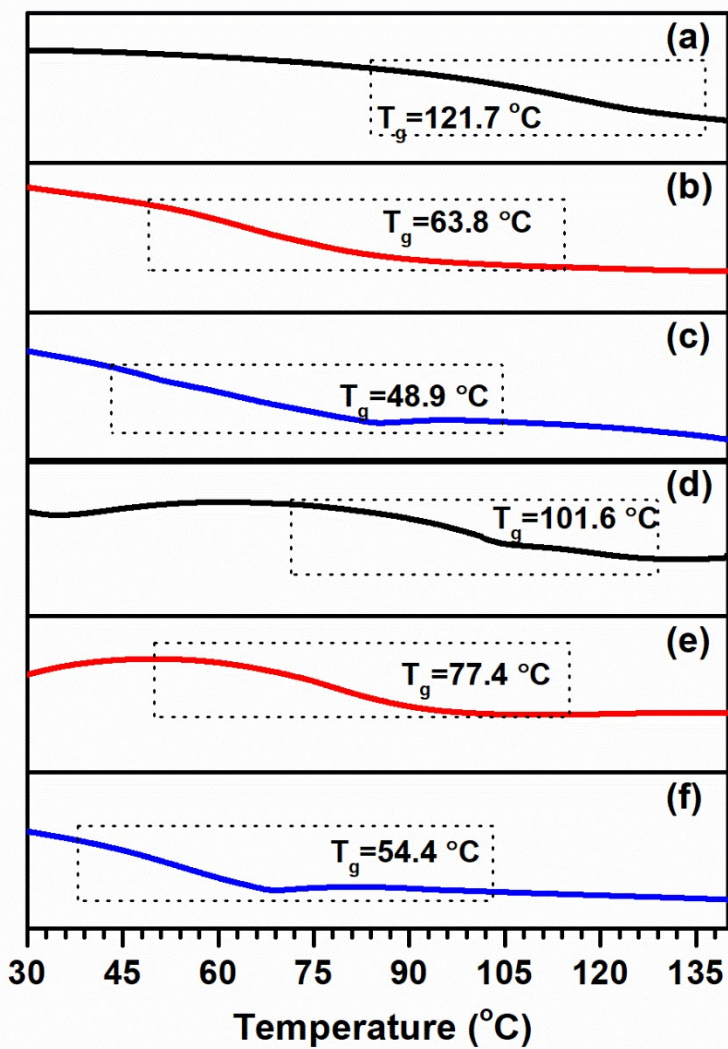

**Figure S8** DSC traces and glass transition temperature ( $T_g$ ) of HESKL (untreated, a), propionate HESKL (90°C, 24 h, b), propionate HESKL (120 °C, 48 h, c) and HEOSHL (untreated, d), propionate HEOSHL (90°C, 24h, e), and propionate HEOSHL (120 °C, 48 h)

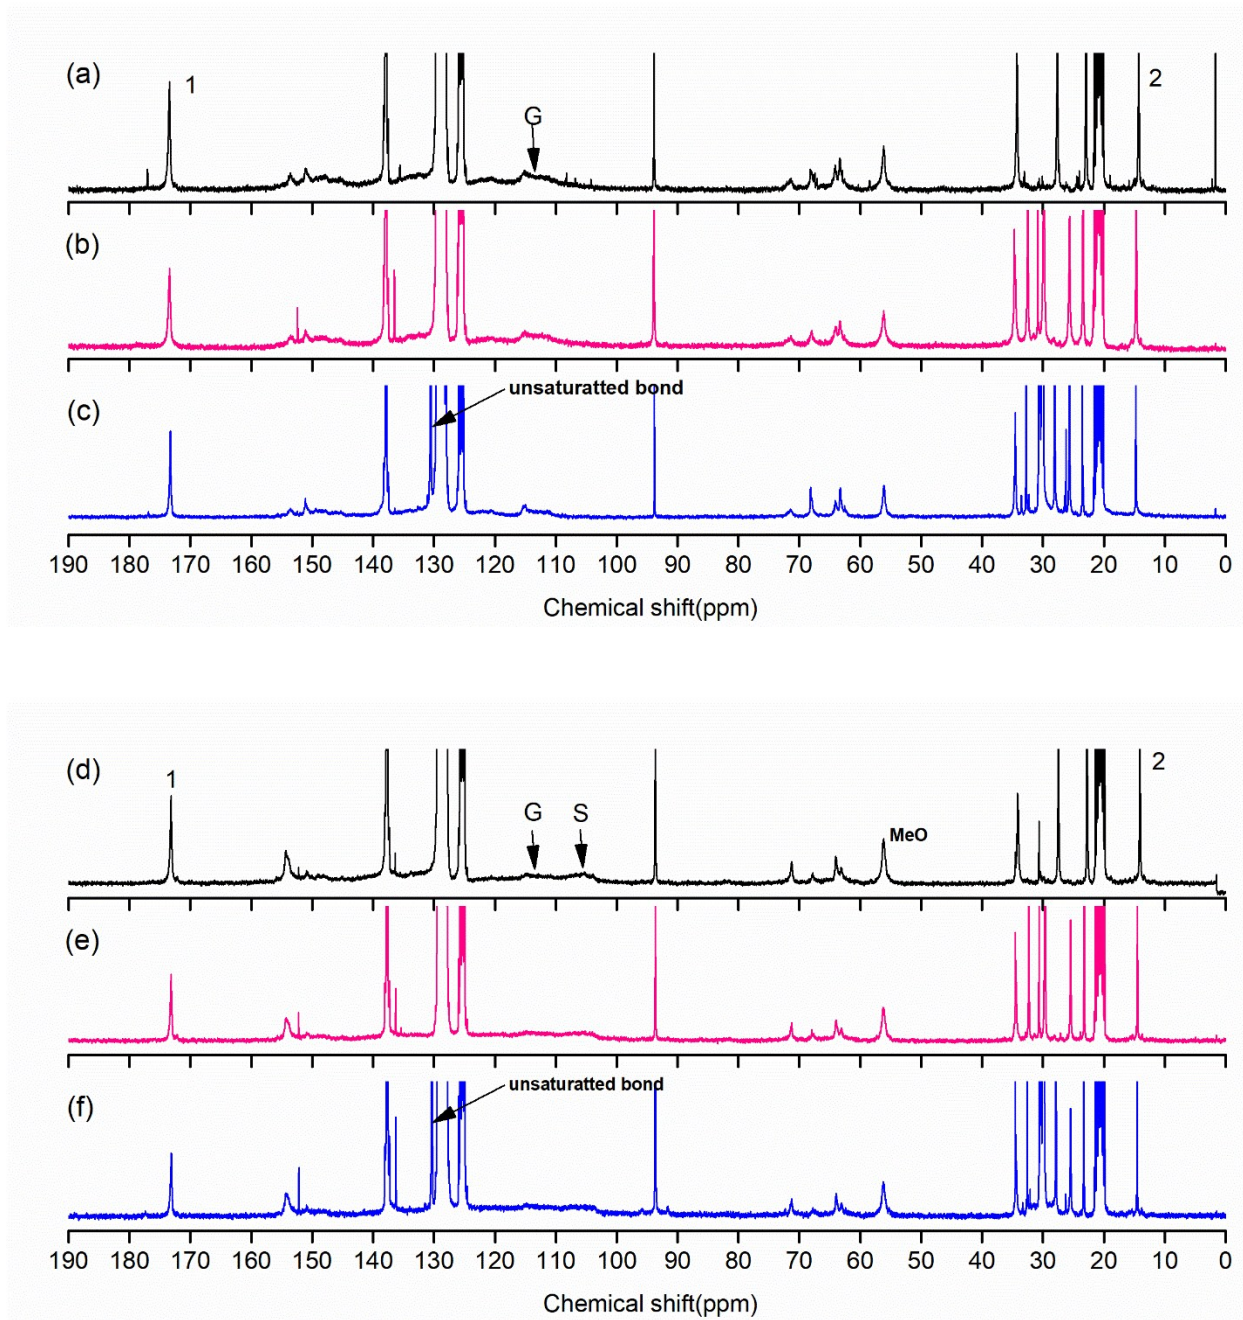

**Figure S9**  $^{13}\text{C}$  NMR spectrum of valerate lignin HESKL (a), octanoate HESKL (b), oleate HESKL (c) and valerate HEOSHL (d), octanoate HEOSHL (e), and oleate HEOSHL

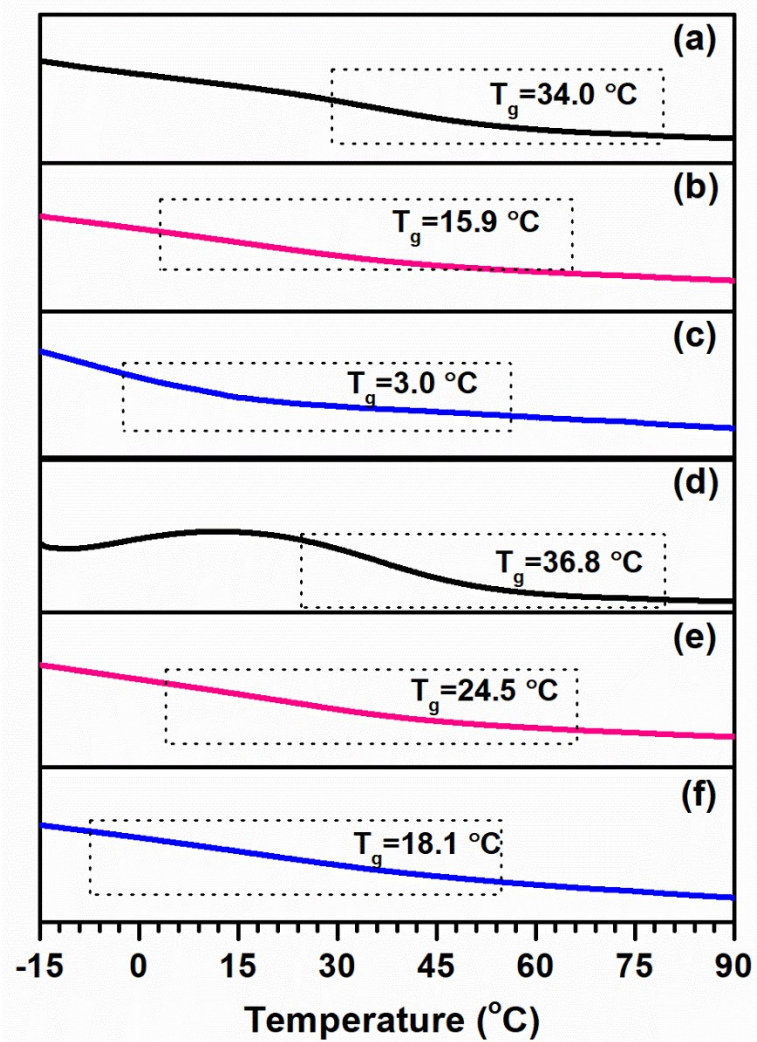

**Figure S10** DSC traces and glass transition temperature ( $T_g$ ) of valerate lignin HESKL (a), octanoate HESKL (b), oleate HESKL (c) and valerate HEOSHL (d), octanoate HEOSHL (e), and oleate HEOSHL

**Table S1** Quantitative  $^{31}\text{P}$  NMR and semi-quantitative  $^{13}\text{C}$  NMR analysis of softwood kraft lignin (SKL), propionate SKL (PSKL), hydroxyethyl SKL (HESKL), organosolv hardwood lignin (OSHL), propionate OSHL (POSHL), and hydroxyethyl OSHL (HEOSHL)

|        | Syringyl<br>/(mmol/g) | 5-substituted<br>/(mmol/g) | Guaiacyl<br>/(mmol/g) | p-hydroxyphenyl<br>/(mmol/g) | Total aromatic<br>OH/(mmol/g) | ArH <sup>a</sup><br>/(100Ar) |
|--------|-----------------------|----------------------------|-----------------------|------------------------------|-------------------------------|------------------------------|
| SKL    | n.a.                  | 1.68                       | 1.48                  | 0.33                         | 3.49                          | 230                          |
| PSKL   | n.a.                  | 1.36                       | 1.45                  | 0.24                         | 3.05                          | 231                          |
| HESKL  | n.a.                  | 0.25                       | 0.14                  | 0.03                         | 0.42                          |                              |
| OSHL   | 2.34                  | 0.34                       | 1.10                  | 0.29                         | 4.07                          | 201                          |
| POSHL  | 2.08                  | 0.32                       | 0.95                  | 0.25                         | 3.60                          | 201                          |
| HEOSHL | 0.08                  | 0.08                       | 0.04                  | 0.21                         | 0.41                          |                              |

<sup>a</sup> ArH: aromatic carbon linked with hydrogen

**Table S2** Semi-quantitative  $^{13}\text{C}$  NMR analysis of HELignin and esterified HELignin using propionic acid with different conditions, the aromatic carbon region (160~100 ppm) was set as 100 Ar;

| No. Lignin | Temp( $^{\circ}\text{C}$ )<br>/time(h) | Peak 1/100 Ar<br>(175~170 ppm)                                                    | Peak 2/100 Ar<br>(10~8 ppm)                                                       | Peak 3/100 Ar<br>(61.5~58 ppm)                                                     | Peak 4/100Ar<br>(65~61.5 ppm)                                                       | ArH <sup>a</sup> /100Ar<br>(125~100 ppm) |
|------------|----------------------------------------|-----------------------------------------------------------------------------------|-----------------------------------------------------------------------------------|------------------------------------------------------------------------------------|-------------------------------------------------------------------------------------|------------------------------------------|
|            |                                        | 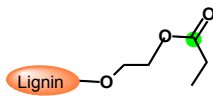 |  |  |  |                                          |
| HESKL      |                                        |                                                                                   |                                                                                   |                                                                                    |                                                                                     |                                          |
| (a)        | untreated                              | -                                                                                 | -                                                                                 | 74                                                                                 | 14                                                                                  | 206                                      |
| (b)        | 90/24                                  | 57                                                                                | 58                                                                                | 39                                                                                 | 54                                                                                  | 212                                      |
| (c)        | 120/48                                 | 82                                                                                | 72                                                                                | 11                                                                                 | 72                                                                                  | 210                                      |
| HEOSHL     |                                        |                                                                                   |                                                                                   |                                                                                    |                                                                                     |                                          |
| (d)        | untreated                              | -                                                                                 | -                                                                                 | 72                                                                                 | 20                                                                                  | 207                                      |
| (e)        | 90/24                                  | 51                                                                                | 47                                                                                | 43                                                                                 | 49                                                                                  | 205                                      |
| (f)        | 120/48                                 | 82                                                                                | 81                                                                                | 19                                                                                 | 71                                                                                  | 203                                      |

<sup>a</sup> ArH: aromatic carbon linked with hydrogen;

**Table S3** Semi-quantitative  $^{13}\text{C}$  NMR analysis of HELignin and esterified HELignin using valeric acid ( $\text{C}_5$ ), octanoic acid( $\text{C}_8$ ), and oleic acid ( $\text{C}_{18}$ ), the peak 3 + peak 4 (65~58 ppm) were set as 100,

| No.    | Lignin | acid                      | Peak 3<br>(61.5~58 ppm)/100 Pr                                                    | Peak 4<br>(65~61.5 ppm)/100 Pr                                                     |
|--------|--------|---------------------------|-----------------------------------------------------------------------------------|------------------------------------------------------------------------------------|
|        |        |                           | 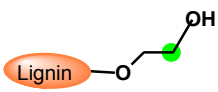 |  |
| HESKL  |        |                           |                                                                                   |                                                                                    |
| (a)    |        | Valeric ( $\text{C}_5$ )  | 17                                                                                | 83                                                                                 |
| (b)    |        | Octanoic ( $\text{C}_8$ ) | 19                                                                                | 81                                                                                 |
| (c)    |        | Oleic ( $\text{C}_{18}$ ) | 15                                                                                | 85                                                                                 |
| HEOSHL |        |                           |                                                                                   |                                                                                    |
| (d)    |        | Valeric ( $\text{C}_5$ )  | 21                                                                                | 79                                                                                 |
| (e)    |        | Octanoic ( $\text{C}_8$ ) | 19                                                                                | 81                                                                                 |
| (f)    |        | Oleic ( $\text{C}_{18}$ ) | 23                                                                                | 77                                                                                 |
